# Supplementary material
Source: Springer Nature journal article supplement (https://www.springermedizin.de/resource/supplementary/12881_2004_81_MOESM1_ESM.pdf/9452374)
Supplement: MOESM1 [file 9452374]

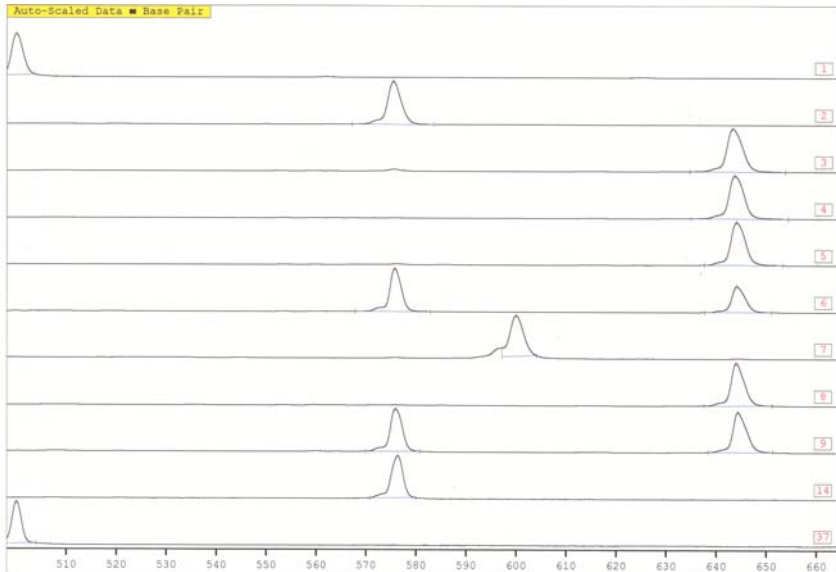

- Ladder
- Normal control
- MRX29
- MRX32
- MRX33
- MRX38
- Affected (GCG)<sub>10+7</sub> male
- Affected dup24 male
- Carrier female with dup24
- Normal control
- Ladder
